# 1 District Level Variation in Hypertension Epidemiology in India and 2 Influence of Social Determinants: National Family Health Survey-5

3 Rajeev Gupta,<sup>1</sup> Kiran Gaur,<sup>2</sup> Suresh C Sharma,<sup>3</sup> Raghubir S Khedar,<sup>1</sup> Rajinder K Dhamija<sup>4</sup>

4 *From:* <sup>1</sup>Department of Medicine, Eternal Heart Care Centre & Research Institute, Jaipur, India;

5 <sup>2</sup>Department of Statistics, Mathematics and Computer Science, Government SKN Agriculture

6 University, Jobner, Jaipur, India. <sup>3</sup>Population Research Centre, Ministry of Health & Family Welfare,

7 Institute of Economic Growth, Delhi University Enclave, New Delhi, India. <sup>4</sup>Department of Neurology,

8 Institute of Human Behavior and Allied Sciences, New Delhi, India.

9 *Correspondence:* Dr Rajeev Gupta, Department of Medicine, Eternal Heart Care Centre and Research  
10 Institute, Jagatpura Road, Jawahar Circle, Jaipur 302017 India. Phones: +91-141-5174000; FAX: +91-  
11 141-5174001; Email: [rajeevgg@gmail.com](mailto:rajeevgg@gmail.com); [drrajeev.gupta@eternalheart.org](mailto:drrajeev.gupta@eternalheart.org);

## 12 ABSTRACT

13 *BACKGROUND:* Enumeration of state and district-level variation in hypertension prevalence in India  
14 and to evaluate the influence of social determinants.

15 *METHODS:* We used data from the Fifth National Family Health Survey (NFHS-5) from 707 districts  
16 and 825,954 participants (women 724,115, men 101,839 men) on prevalence of hypertension  
17 defined according to standard criteria. Data on multiple social determinants were also obtained from  
18 NFHS-5 report.

19 *RESULTS:* Age-standardized prevalence of hypertension was 22.4% (women 21.3%, men 24.0%) with  
20 the highest prevalence in women and men, respectively, in Sikkim (34.5 and 41.6%) and Punjab (31.2  
21 and 37.7%) and lowest in Rajasthan (15.4 and 17.9%) and Ladakh (15.7 and 17.4%). Prevalence was  
22 more in western and southern Indian districts. High prevalence of hypertension in the young (<30y)  
23 was observed in northeastern and northern states. District-level hypertension prevalence correlated  
24 negatively with multi-dimensional poverty index ( $R^2$  women 0.299, men 0.245) and positively with  
25 female literacy (women 0.165, men 0.134). Among women, districts with the highest availability of  
26 electricity, clean water, sanitation, clean cooking fuels, healthcare service delivery and better  
27 nutrition were associated with more hypertension on univariate and multivariate analyses ( $p < 0.05$ ).

28 *CONCLUSIONS:* The study shows significant geographical variation in hypertension prevalence in  
29 India. Hypertension is more in men with high prevalence of premature hypertension. Better district-  
30 level development (less poverty, more literacy) and healthcare services are associated with greater  
31 hypertension prevalence in women.

32 KEY WORDS: Hypertension; Raised blood pressure; Epidemiology; Non-communicable diseases;

33 Social determinants.

34 *Article Statistics:* Abstract 225 words; Text: 2818; References 36; Tables 4; Figures 4. Supplementary

35 Tables 35; Supplementary Figures 3.

36

37

38

## SUMMARY TABLE

39 **What is known about the topic:**

- 40       • Significant state-level variation in hypertension prevalence in India has been reported but  
41       district-level variation is not known.
- 42       • Social determinants are important in hypertension but not well studied, especially in  
43       women.

44 **What this study adds:**

- 45       • The study shows a significant district-level variation with greater hypertension prevalence in  
46       southern and western India.
- 47       • Hypertension among the young, <30 years, is more in less developed districts.
- 48       • Social determinants of hypertension in women are less poverty, more literacy and  
49       availability of healthcare services.

50

51

## INTRODUCTION

52 World Health Organization (WHO) and others have reported that high blood pressure (BP) is  
53 the most important risk factor for mortality and disease burden in both women and men, globally  
54 and in India.<sup>1-4</sup> Studies have reported significant inter-country variation in hypertension prevalence  
55 with the highest prevalence rates in Eastern European, Central Asian and Eastern Asian  
56 countries.<sup>1,3,5,6</sup> Within-country variation has also been reported from several large countries- China,  
57 USA, Brazil, Indonesia, Pakistan, UK- and Europe.<sup>7-13</sup> A county (district) level variation has been  
58 reported from the USA and UK.<sup>14,15</sup> Studies from USA, UK and China have reported greater  
59 hypertension prevalence in less developed regions and counties.<sup>7,8,12</sup> Risk factors for hypertension  
60 are social and biological.<sup>16</sup> Social determinants of hypertension include low-quality urban and rural  
61 infrastructure, low socioeconomic status, social disorganization, unemployment, adverse work  
62 environment, illiteracy, adverse early life events, subnormal maternal and child health, etc.<sup>16,17</sup> It has  
63 been reported that macrolevel and micro-level variations in social, lifestyle and biological factors are  
64 responsible for difference in hypertension prevalence.<sup>16</sup>

65 Previous national studies in India- District Level Health Survey/Adult Health Survey (DLHS-  
66 4/AHS-3)<sup>18</sup> and Fourth National Family Health Survey (NFHS-4)<sup>19</sup> have reported significant state-level  
67 variation in hypertension prevalence. It has been reported that macro-level social factors such as  
68 greater urbanization, better human development index, more literacy and raised body mass index  
69 (BMI) are associated with this variation.<sup>19</sup> This contrasts with developed countries where  
70 hypertension is more in lesser developed and deprived regions and communities.<sup>12,15</sup> India has  
71 undergone rapid socio-economic progress in recent years. To correlate variation in hypertension  
72 prevalence at the district (county) level with various social factors we performed the present study.  
73 We used district-level data from Fifth National Family Health Survey (NFHS-5)<sup>20</sup> on hypertension  
74 prevalence and performed correlation with multiple social determinants of health.

75

## METHODS

76 Data from NFHS-5 are available at the National Family Health Survey website at  
77 [http://rchiips.org/nfhs/factsheet\\_NFHS-5.shtml](http://rchiips.org/nfhs/factsheet_NFHS-5.shtml).<sup>20</sup> NFHS is a large-scale, multi-round survey  
78 conducted in a representative sample of households throughout India. Multiple rounds of the survey  
79 have been conducted since the first survey in 1992-93. The survey provides state and national  
80 information for India on fertility, infant and child mortality, the practice of family planning, maternal  
81 and child health, reproductive health, nutrition, anemia, utilization and quality of health and family  
82 planning services. Each successive round of the NFHS has had two specific goals: a) to provide  
83 essential data on health and family welfare needed by the Ministry of Health and Family Welfare and  
84 other agencies for policy and program purposes, and b) to provide information on important  
85 emerging health and family welfare issues. Ethics clearance has been obtained by the Institutional  
86 Ethics Committee of Indian Institute of Population Sciences, Mumbai, India. Technical assistance for  
87 the NFHS has been provided by ICF International (Virginia, USA) and other organizations on specific  
88 issues. The funding for different rounds of NFHS has been provided by USAID, DFID, the Bill and  
89 Melinda Gates Foundation, UNICEF, UNFPA, and Ministry of Health and Family Welfare, Government  
90 of India. In NFHS-5, similar to the previous iterations, the sample was designed to provide data of all  
91 key indicators at the national and state levels as well as estimates for most key indicators at the  
92 district level for almost all the districts of the country.<sup>20</sup>

93 The total sample size in NFHS-5 was 610,000 households in India. This was estimated to  
94 produce reliable data for each district of the country. The sample selection process was similar to  
95 the previous NFHS studies. The rural sample was selected through a 2-stage sampling with villages as  
96 the primary sampling unit (PSU) at the first stage selected with probability proportional to size,  
97 followed by a random selection of 22 households in each PSU at the second stage. In urban areas,  
98 there was also a 2-stage sampling design with Census Enumeration Blocks (CEB) selected at the first  
99 stage and a random selection of 22 households in each CEB at the second stage. In the second stage  
100 in both rural and urban areas, households were selected after conducting a complete mapping and  
101 household listing operation in the selected first-stage units. NFHS-5 fieldwork for India was

102 conducted in two phases, phase one from 17 June 2019 to 30 January 2020 and phase two from 2  
103 January 2020 to 30 April 2021 by 17 Field Agencies and gathered information from 636,699  
104 households, 724,115 women, and 101,839 men in 705 districts of the country.

105 The biomarker questionnaire included measurements of height, weight, waist and hip  
106 circumference, hemoglobin levels and finger-stick blood for additional testing in a laboratory for  
107 women aged 15-49 years and men aged 15-54 years. Blood pressure and random blood glucose  
108 were measured in all women and men aged 15 years and more in contrast to NFHS-4.<sup>19</sup>  
109 Questionnaire information and biomarkers were collected after informed consent from each  
110 participant. In the NFHS-5 the BP of eligible respondents was measured using an OMRON Blood  
111 Pressure Monitor to determine the prevalence of hypertension. BP measurements for each  
112 respondent were taken on three separate occasions and the readings were recorded in the  
113 Biomarker Questionnaire with an interval of 5 minutes between readings. Respondents whose  
114 systolic BP was >130 mm Hg or diastolic BP > 85 mm Hg were considered to have elevated blood  
115 pressure readings and were encouraged to see a doctor for a full evaluation. Hypertension was  
116 diagnosed when systolic BP was  $\geq 140$  mmHg and/or diastolic BP  $\geq 90$  mmHg or when the participant  
117 was taking medicine to control BP and reported in per cent (%).

118 ***Statistical analyses:***

119 Data sheets were downloaded from the NFHS-5 website. Additional data were obtained  
120 from the Population Research Centre, Institute of Economic Growth, Delhi University, New Delhi,  
121 India. Data were transferred to MS Excel sheets and descriptive analyses were performed using this  
122 program. Hypertension prevalence rates are reported separately for women and men and have been  
123 age-adjusted to the population of India. A  $\chi^2$  test was used to determine the significance of women-  
124 men differences. Hypertension prevalence rates for various districts of the country (n=705) were  
125 also obtained from the NFHS-5 website and reported separately for women and men. State-level  
126 mean, medians and 25-75 interquartile intervals (IQR) for hypertension were calculated. Univariate

127 correlation of district hypertension prevalence with social determinants (Supplementary Table 1)  
128 was performed using polynomial regression and graphs were computed in MS Excel. For multivariate  
129 correlation, we used SPSS statistical package.

130 **Role of funding sources:**

131 No direct funding was obtained for writing this report. National Family Health Surveys are  
132 funded by various grants from the Government of India.

133 **RESULTS**

134 NFHS-5 enrolled 724,115 women and 101,839 men >15 years of age (total of 825,954) with  
135 response rates more than 90%.<sup>20</sup> Data for multiple socioeconomic, lifestyle and clinical variables  
136 were obtained and recorded. National age-adjusted prevalence (%) of hypertension among women  
137 was 21.3% and men 24.0% (overall 22.4%). Age-adjusted prevalence (%) of hypertension among  
138 women and men in different states of India is in Table 1. There is significant state-level variation in  
139 hypertension prevalence. In women the highest prevalence is in Sikkim (34.5%), Punjab (31.2%) and  
140 Goa (27.5%) and the lowest in Rajasthan (15.4%), Ladakh (15.7%) and Bihar (15.9%). In men the  
141 highest prevalence is in Sikkim (41.6%), Punjab (37.7%) and Manipur (33.2%) while the lowest is in  
142 Ladakh (17.4%), Rajasthan (17.9%) and Bihar (18.4%) (Figure 1). Hypertension prevalence in various  
143 states and districts of India in women and men is shown as a heat map (Figure 2). High prevalence is  
144 observed in southern and eastern Indian states. There is a significant district-level variation with  
145 greater prevalence in most western and southern districts in women and western, southern and  
146 eastern districts in men. Absolute prevalence rates for each district among women and men are in  
147 Supplementary Tables 2-34. We also calculated median (IQR) hypertension prevalence in each state  
148 according to the district-level prevalence and prevalence rates for women and men shown in  
149 Supplementary Figure 1.

150 Age-group stratified hypertension prevalence among women and men for the whole country  
151 and all the states are in Table 2. There is a significant age-associated escalation in its prevalence in all

152 the states of the country (Mantel-Haenszel  $\chi^2$  for trend,  $p < 0.001$ ). Higher prevalence of  
153 hypertension in the young (<30 years) is observed among men and women in most North-Eastern  
154 Indian states (Arunachal Pradesh, Assam, Meghalaya, Nagaland, Sikkim and West Bengal), Jammu &  
155 Kashmir, Ladakh and Goa (Supplementary Figure 2). On the other hand, high prevalence of  
156 hypertension among the elderly ( $\geq 60$ yr) is observed in Delhi, Goa, Karnataka, Kerala, Punjab, Sikkim  
157 and Telangana.

158 Data on multiple social determinants were obtained from various government databases,  
159 NFHS-5 and others.<sup>19,20</sup> District-level multidimensional poverty index is negatively associated with  
160 the prevalence of hypertension in both women and men with polynomial  $R^2$  of 0.299 and 0.245,  
161 respectively (Figure 3a). Hypertension prevalence is positively associated with district-level female  
162 literacy levels in both women and men with polynomial  $R^2$  of 0.165 and 0.134, respectively (Figure  
163 3b). Data on social determinants in NFHS-5 have been primarily obtained for women, therefore, we  
164 determined variation of hypertension prevalence in women according to them. Correlation of  
165 district-level hypertension prevalence among women with various social, healthcare delivery and  
166 clinical determinants are in Figure 4. Increasing hypertension prevalence among women correlates  
167 significantly with declining poverty, better literacy, sanitation, and electricity, and availability of  
168 clean fuel for cooking (Figure 4a). Greater hypertension prevalence is also observed in district with  
169 lower childhood marriages and teenage pregnancies and greater vaccination coverage, modern  
170 contraceptive usage and availability of skilled delivery services (Figure 4b). Presence of childhood  
171 overweight, adult overweight (BMI  $\geq 25$ ) and adult hyperglycemia is also associated with greater  
172 hypertension prevalence (Figure 4c).

173 To identify important social determinants among women we classified various  
174 socioeconomic-, environmental-, healthcare service-, womankind specific-, and nutritional variables  
175 into tertiles and determined hypertension prevalence in each of them (Table 3). Analyses of social  
176 determinants show that in districts with lower poverty and illiteracy and the highest prevalence of  
177 availability of electricity, clean water, sanitation and clean cooking fuels, the prevalence of



178 hypertension is the highest. Availability of better healthcare service delivery (higher availability of  
179 skilled childbirth, use of modern contraception and full vaccination) and better nutrition (lower  
180 anemia, childhood stunting or wasting, overweight in children and adults) is also associated with  
181 greater prevalence of hypertension. We also calculated univariate and multivariate regression  
182 coefficients to identify important variables (Table 4). On univariate analysis. There are multiple  
183 factors associated with district level hypertension prevalence including socioeconomic and  
184 environmental variables (multidimensional poverty index, illiteracy, access to electricity, clean  
185 drinking water and sanitation, tobacco use), healthcare service delivery parameters and nutritional  
186 factors. However, on multivariate analyses risk factors that continue to be significant are low female  
187 illiteracy (standardized b -0.12), improved drinking water (0.11), sanitation (0.19), modern  
188 contraceptive use (0.20) and overweight or obesity in women (0.44) ( $p < 0.05$ ).

## 189 **DISCUSSION**

190 Fifth National Family Health Survey (NFHS-5) is the most representative and comprehensive  
191 hypertension epidemiology study in India. The study shows that there is substantial variation in  
192 hypertension prevalence across states and districts of the country. The prevalence of hypertension is  
193 more in better-developed states and districts. Hypertension in the young (<30 y) is more in the  
194 northeastern and northern states of the country. Greater hypertension prevalence in more  
195 developed districts (lower multidimensional poverty, and better literacy, healthcare services and  
196 nutritional status) in India, contrasts with developed countries where hypertension is more in lesser  
197 developed locations and states. These findings suggest that macrolevel cardiovascular disease risk  
198 factor transition associated with demographic and epidemiological shifts is still evolving in India.

199 Geographic variation in hypertension prevalence has been reported from all the large  
200 countries of the world.<sup>7-15</sup> There are significant difference in prevalence rates at state and district-  
201 levels. In China, greater hypertension prevalence has been reported from less developed western  
202 and south-eastern regions;<sup>7</sup> in USA, hypertension prevalence is greater in southern and south-

203 eastern states and less developed counties;<sup>8</sup> and in the UK hypertension is more in deprived  
204 counties of northern region.<sup>12</sup> Global Burden of Disease (GBD) Study sub-national collaborators have  
205 reported greater hypertension related mortality in deprived regions of Brazil.<sup>9</sup> On the other hand, in  
206 lower middle income countries such as India, Indonesia and Pakistan, greater hypertension  
207 prevalence and hypertension related cardiovascular mortality have been reported from better  
208 developed states and locations.<sup>10,11,19</sup> Country-level differences also exist in hypertension In Europe  
209 and Asia. In Europe hypertension prevalence is significantly greater in less developed countries of  
210 Central and Eastern Europe,<sup>13</sup> while in Asia the prevalence of hypertension is significantly lower in  
211 high income countries of Eastern Asia and high in Central and Southern Asian countries.<sup>21</sup> Positive  
212 association of hypertension in India with better development suggests that the risk factor transition  
213 that happens with social development has not yet occurred in India.<sup>23</sup> There is, on the other hand,  
214 evidence that at an individual level, hypertension may be more among illiterate rural and slum-  
215 dwelling populations,<sup>23,24</sup> and there is a significant association of low socioeconomic and educational  
216 status with greater cardiovascular mortality.<sup>25,26</sup> In the present study we have shown a positive  
217 association of human development with hypertension in India and more studies are needed to  
218 identify the importance of individual and macrolevel social determinants.

219 An important finding in the present study is a high prevalence of premature hypertension,  
220 especially in lesser developed states of northeastern and northern India. Higher prevalence of  
221 hypertension at young age in India, compared to countries of North and South America and Europe  
222 has been previously reported in the DLHS-4/AHS study.<sup>18</sup> Northeastern Indian states have a very  
223 proportion of tribal population and a high prevalence of hypertension among these populations has  
224 also been reported.<sup>27</sup> Hypertension in the young is an important problem among less developed  
225 societies in Africa and among African Americans in USA.<sup>28</sup> There is a significant association of  
226 premature hypertension with stroke in these communities. Million Death Study in India reported a  
227 significantly greater stroke burden and mortality in the eastern and north-eastern states of the  
228 country.<sup>29</sup> This corresponds to the presence of premature hypertension in these regions. More

229 studies are required to elucidate reasons for greater hypertension and stroke burden among the  
230 Sub-Himalayan regions of India.

231 The study has several strengths- this is the one of the first studies that has evaluated  
232 hypertension prevalence in each district of the country. The DLHS-4/AHS study also evaluated  
233 hypertension in multiple districts but two important states were missing.<sup>18</sup> IN NFHS-4 the sample  
234 size was restricted to the young and middle aged and did not provide data on elderly which have  
235 greater hypertension.<sup>30</sup> The ICMR-INDIAB study also obtained data on hypertension in multiple  
236 states but sampling was based on state-level data and not at the district level.<sup>31</sup> We have also  
237 identified districts with greater hypertension prevalence. This is important for policy-making as these  
238 districts should be the initial focus for hypertension control initiatives.<sup>32</sup> Identification of districts  
239 with premature hypertension is also important as deployment of primary prevention strategies in  
240 these regions (salt, alcohol and tobacco control, healthy foods). Limitations of the study include a  
241 skewed female-male ratio in the recruitment of the sample (NFHS reports are focused on women's  
242 health factors), single-day measurement of BP which is not recommended to confirm the diagnosis  
243 of hypertension, use of older definition of hypertension (SBP  $\geq 140$  and/or DBP  $\geq 90$  mmHg) instead of  
244 more recently suggested criteria (SBP  $\geq 130$  and/or DBP  $\geq 80$  mmHg). In the present study we do not  
245 yet have data on hypertension awareness, awareness and control status and this is also a limitation.  
246 Data on pre-hypertension, which is more prevalent than hypertension in India, and should be the  
247 focus of prevention strategies, are not yet available. There is a need for more primary data on  
248 hypertension determinants to explain regional variations including social and cultural determinants  
249 of physical activity and diet. Data on district-level availability and access to healthcare and  
250 availability of drug-therapies to individuals, especially women, with hypertension are not available.  
251 Finally, all these data need replication for external validation using data from concurrent studies  
252 including the ICMR-INDIAB and other national surveys.

253 **Conclusions:**

254           It has been argued that phase transition in the human progress has been brought about by  
255 tectonic shifts in development with technological progress in every corner of the globe. This has  
256 lifted most societies out of Malthusian trap but aspects of local geography, culture and institutions  
257 are also important in this transition.<sup>33</sup> Our study shows that the escape from poverty and illiteracy  
258 among women is associated with greater hypertension prevalence in India and forecasts a short-  
259 term scenario with more hypertension with better social development. We hope that a  
260 socioeconomic tipping point shall arrive soon where hypertension is more in lower socioeconomic  
261 status individuals.<sup>34</sup> India and most low-middle income and low-income countries have significantly  
262 higher adverse cardiovascular events and mortality from hypertension.<sup>35</sup> Reversal of this trend is  
263 possible using well-tried evidence-based interventions at the level of population and individuals  
264 cross the life course. The creation of an egalitarian society with a focus on various components of  
265 inequality,<sup>34</sup> availability of non-communicable disease-focused healthcare,<sup>36</sup> and population  
266 empowerment,<sup>36</sup> would lead to lower hypertension among the more developed communities and  
267 regions of the country.  
268

269 **CONTRIBUTORS**

270 RG and KG conceptualized the study. Data analyses and estimate generation were done by KG and  
271 SS. Maps were generated by KG. RG drafted the first iteration of the manuscript. RG, KG, SS and RKD  
272 made substantial contributions to critical review, editing and revision of the manuscript. All the  
273 authors approved the final version of the manuscript. RG, KG and SS accessed and verified the data  
274 underlying the study. All authors had full access to all the data in the study and had final  
275 responsibility for the decision to submit for publication.

276

277 **DECLARATION OF INTERESTS:**

278 All the authors declare no competing interests. KG is an employee of Government of Rajasthan and  
279 SS and RKD are employed by Government of India.

280

281 **DATA SHARING:**

282 All the data used for the manuscript are freely available at the National Family Health Survey  
283 website at <http://rchiips.org/nfhs/>.

284

285 **ACKNOWLEDGEMENTS:**

286 No specific funding was available for this article.

287

## LEGENDS TO TABLES

288 **Table 1: Hypertension prevalence in Indian states in NFHS-5 in women and men >15 years. Criteria**

289 **for diagnosis of hypertension were systolic BP  $\geq$ 140 mmHg and/or diastolic BP  $\geq$ 90 mmHg or on**

290 **medical treatment.**

291 **Table 2: Age-group specific hypertension prevalence in Indian states in women and men.**

292 **Table 3: Hypertension prevalence (% , 95% CI) in women according to tertiles of various social**

293 **indicators.**

294 **Table 4: Univariate and multivariate regression analysis (standardized b) of district-level**

295 **hypertension prevalence (women) with various socioeconomic and other factors.**

296

## LEGENDS TO FIGURES

297 **Figure 1: Hypertension prevalence among women and men in various states of India in NFHS-5.**

298 **Figure 2: Heat map showing state-level prevalence (Figure 2a) and district-level prevalence (Figure**

299 **2b) of hypertension among women and men in NFHS-5.**

300 **Figure 3: Inverse correlation of district-level hypertension prevalence in women and men with**

301 **increasing multidimensional poverty index (Figure 3a) and positive correlation of district-level**

302 **hypertension prevalence in women and men with increasing literacy (Figure 3b).**

303 **Figure 4 (a-c): Correlation of district-level hypertension prevalence in women with various (a)**

304 **social, (b) healthcare delivery, and (c) clinical determinants.**

305

## REFERENCES

- 306 1. World Health Organization. Invisible numbers: the true extent of non-communicable diseases  
307 and what to do about them. Geneva. World Health Organization. 2022.
- 308 2. Global Burden of Disease Study 2019 Risk Factor Collaborators. Global burden of 87 risk factors  
309 in 204 countries and territories, 1990–2019: a systematic analysis for the Global Burden of  
310 Disease Study 2019. *Lancet*. 2020; 396:1223-1250.
- 311 3. Global Burden of Diseases CVD Collaborators. Global burden of cardiovascular diseases and risk  
312 factors, 1990-2019: Update from the Global Burden of Disease 2019 Study. *J Am Coll Cardiol*.  
313 2020; 76:2982-3021.
- 314 4. Gupta R, Xavier D. Hypertension: the most important non-communicable disease risk factor in  
315 India. *Indian Heart J*. 2018; 70:565-572.
- 316 5. NCD Risk Factor Collaboration (NCD-RISC). Worldwide trends in blood pressure from 1975 to  
317 2015: a pooled analysis of 1479 population-based measurement studies with 19.1 million  
318 participants. *Lancet*. 2017; 389:37-55.
- 319 6. NCD Risk Factor Collaboration. Worldwide trends in hypertension prevalence and progress in  
320 treatment and control from 1990 to 2019: A pooled analysis of 1173 population-representative  
321 studies with 104 million participants. *Lancet*. 2021; 398:957-980.
- 322 7. Li Y, Wang L, Feng X, Zhang M, Huang Z, Deng Q, Zhou M, Astell-Burt T, Wang L. Geographical  
323 variations in hypertension prevalence, awareness, treatment and control in China: Findings from  
324 a nationwide and provincially representative survey. *J Hypertens*. 2018; 36:178-187.
- 325 8. Centres for Disease Control and Prevention. Hypertension maps and data sources: prevalence of  
326 hypertension, 2017. Available at: [https://www.cdc.gov/bloodpressure/maps\\_data.htm](https://www.cdc.gov/bloodpressure/maps_data.htm). Accessed  
327 7 March 2023.



- 328 9. Nascimento BR, Brant LCC, Yadgir S, Oliveira GMM, Roth G, Glenn SD, Mooney M, Naghavi M,  
329 Passos VMA, Duncan BB, Silva DAS, Malta DC, Ribeiro ALP. Trends in prevalence, mortality and  
330 morbidity associated with high systolic blood pressure in Brazil from 1990 to 2017: estimates  
331 from the Global Burden of Disease 2017 (GBD 2017) study. *Pop Health Metrics*. 2020; 18:e17.
- 332 10. GBD 2019 Indonesia Subnational Collaborators. The state of health in Indonesia's provinces,  
333 1990-2019: a systematic analysis for the Global Burden of Disease Study 2019. *Lancet Glob*  
334 *Health*. 2022; 10:e1632-1645.
- 335 11. GBD 2019 Pakistan Collaborators. The state of health in Pakistan and its provinces and  
336 territories, 1990-2019: a systematic analysis for the Global Burden of Disease Study 2019. *Lancet*  
337 *Glob Health*. 2023; 11:e229-243.
- 338 12. British Heart Foundation. Heart and circulatory disease statistics 2022. Available at:  
339 [https://www.bhf.org.uk/what-we-do/our-research/heart-statistics/heart-statistics-](https://www.bhf.org.uk/what-we-do/our-research/heart-statistics/heart-statistics-publications/cardiovascular-disease-statistics-2022)  
340 [publications/cardiovascular-disease-statistics-2022](https://www.bhf.org.uk/what-we-do/our-research/heart-statistics/heart-statistics-publications/cardiovascular-disease-statistics-2022). Accessed 7 March 2023.
- 341 13. Timmis A, Townsend N, Gale CP, Torbica A, Lettino M, Petersen SE, Mossialo EA, Maggioni AP,  
342 Kazakiewicz D, May HT, Smedt DD, Flather M, Zuhlke L, Beltrame JF, Huculeci R, Tavazzi L,  
343 Hindricks G, Bax J, Cadedei B, Achenbach S, Wright L, Vardas P. European Society of Cardiology:  
344 cardiovascular disease statistics 2019. *Eur Heart J*. 2020; 40:12-85.
- 345 14. Vaughan AS, Coronado F, Casper M, Loustalot F, Wright JS. County level trends in hypertension  
346 related cardiovascular mortality: United States, 2000 to 2019. *J Am Heart Assoc*. 2022;  
347 11:e024785.
- 348 15. Hughes A. Hypertension prevalence estimates in England, 2017: Estimated from the Health  
349 Survey for England. London. Public Health England. 2020.

- 350 16. Hall ME, Hall JE, Whelton PK. Epidemiology, pathophysiology and treatment of hypertension. In:  
351 Fuster V, Narula J, Vaishnava P, et al. Editors. Fuster & Hurst's: The Heart, 15<sup>th</sup> Ed. New York:  
352 McGraw-Hill. 2022;189-232.
- 353 17. Marmot M, Wilkinson R. Social Determinants of Health, 2<sup>nd</sup> Ed. Oxford. Oxford University Press.  
354 2006.
- 355 18. Geldsetzer P, Manne-Goehler J, Theilmann M, Davies JI, Awasthi A, Vollmer S, Jaacks LM,  
356 Barnighausen T, Atun R. Diabetes and hypertension in India: a nationally representative study of  
357 1.3 million adults. *JAMA Intern Med.* 2018; 178:363-372.
- 358 19. Gupta R, Gaur K, Ram CVS. Emerging trends in hypertension epidemiology in India. *J Hum*  
359 *Hypertens.* 2019. 33:575-587.
- 360 20. National Family Health Survey of India. Available at: <http://rchiips.org/nfhs/>. Accessed 7  
361 March19023.
- 362 21. Gupta R, Gaur K. Hypertension epidemiology in India: Recent nationwide studies and comparison  
363 with Asian countries. In: Ponde CK, Mohanan PP. Editors. *Cardiology 2022: Hypertension.*  
364 Bengaluru. Microlabs Ltd. 2022. 235-244.
- 365 22. Subramanian S, Ambade M, Kumar A, Chi H, Joe W, Rajpal S, Kim R. Progress on Sustainable  
366 Development Goal indicators in 707 districts of India: a quantitative mid-line assessment using  
367 the National Family Health Surveys, 2016 and 2021. *Lancet Reg Health SE Asia.* 2023;100155.
- 368 23. Gupta R, Gupta VP, Ahluwalia NS. Educational status, coronary heart disease and coronary risk  
369 factor prevalence in a rural population of India. *BMJ.* 1994; 309:1332-1336
- 370 24. Gupta R, Kaul V, Agrawal A, Guptha S, Gupta VP. Cardiovascular risk according to educational  
371 status in India. *Prev Med.* 2010; 51:408-411.
- 372 25. Rosengren A, Smyth A, Rangarajan S, Ramasundarahettige C, Bangdiwala SI, AlHabib KF, Avezum  
373 A, Bengtsson Boström K, Chifamba J, Gulec S, Gupta R, Igumbor EU, Iqbal R, Ismail N, Joseph P,

- 374 Kaur M, Khatib R, Kruger IM, Lamelas P, Lanas F, Lear SA, Li W, Wang C, Quiang D, Wang Y,  
375 Lopez-Jaramillo P, Mohammadifard N, Mohan V, Mony PK, Poirier P, Srilatha S, Szuba A, Teo K,  
376 Wielgosz A, Yeates KE, Yusoff K, Yusuf R, Yusufali AH, Attaei MW, McKee M, Yusuf S..  
377 Socioeconomic status and risk of cardiovascular disease in 20 low-income, middle-income, and  
378 high-income countries: the Prospective Urban Rural Epidemiology (PURE) study. *Lancet Glob*  
379 *Health*. 2019; 7:e748-760.
- 380 26. Joseph P, Kutty VR, Mohan V, Kumar R, Mony P, Vijayakumar K, Islam S, Iqbal R, Kazmi K, Rahman  
381 O, Yusuf R, Anjana RM, Mohan I, Rangarajan S, Gupta R, Yusuf S. Cardiovascular disease,  
382 mortality and their associations with modifiable risk factors in a multinational South Asia cohort:  
383 A PURE substudy. *European Heart J*. 2022; 43:2831-2840.
- 384 27. Hazarika C, Babu BV. Prevalence of hypertension in Indian tribal population: a systematic review  
385 and meta-analysis. *J Racial Ethn Health Disparities*. 2023; Epub. doi: 10/1007/s40615-023-01532-  
386 6.
- 387 28. Zhou B, Perel P, Mensah GA, Ezzati M. Global epidemiology, health burden and effective  
388 interventions for elevated blood pressure and hypertension. *Nature Rev Cardiol*. 2021; 18:785-  
389 802.
- 390 29. Ke C, Gupta R, Xavier D, Prabhakaran D, Mathur P, Kalkonde YV, Kolpak P, Suraweera W, Jha P;  
391 Million Death Study Collaborators.. Divergent trends in ischemic heart disease and stroke  
392 mortality in India from 2000 to 2015: A nationally representative mortality survey. *Lancet Global*  
393 *Health*. 2018; 6:e914-923.
- 394 30. Prenissl J, Manne-Goehler J, Jaacks LM, Prabhakaran D, Awasthi A, Bischops AC, Atun R,  
395 Bärnighausen T, Davies JI, Vollmer S, Geldsetzer P. Hypertension screening, awareness,  
396 treatment and control in India: a nationally representative cross sectional study among  
397 individuals aged 15-49 years. *PLoS Med*. 2019; 16:e1002801.

- 398 31. Anjana RM, Unnikrishnan R, Deepa M, Pradeepa R, Tandon N, Das AK, Joshi S, Bajaj S, Jabbar PK,  
399 Das HK, Kumar A, Dhandhanika VK, Bhansali A, Rao PV, Desai A, Kalra S, Gupta A, Lakshmy R,  
400 Madhu SV, Elangovan N, Chowdhury S, Venkatesan U, Subashini R, Kaur T, Dhaliwal RS, Mohan  
401 V; ICMR-INDIAB Collaborative Study Group. Metabolic non-communicable disease health report  
402 of India: the ICMR-INDIAB national cross-sectional study (ICMR-INDIAB 17). *Lancet Diabetes*  
403 *Endocrinol.* 2023; 11:474-489.
- 404 32. Kaur P, Kunwar A, Sharma M, Durgad K, Gupta S; India Hypertension Control Initiative  
405 collaboration; Bhargava B. The India Hypertension Control Initiative: early outcomes in 26  
406 districts across 5 states of India, 2018-2020. *J Hum Hypertens.* 2023; 37:560-567.
- 407 33. Galor O. Metamorphosis. In: *The Journey of Humanity: The Origins of Wealth and Inequality.*  
408 Dublin. Penguin Random House. 2022;85-100.
- 409 34. Piketty T. Toward a democratic, ecological and multicultural socialism. In: *A Brief History of*  
410 *Equality.* Cambridge, MA. Harvard University Press. 2022; 226-244.
- 411 35. Walli-Attai M, Rosengren A, Rangarajan S, Breet Y, Abdul-Razak S, Sharief WA, Alhabib KF,  
412 Avezum A, Chifamba J, Diaz R, Gupta R, Hu B, Iqbal R, Ismail R, Kelishadi R, Khatib R, Lang X, Li S,  
413 Lopez-Jaramillo P, Mohan V, Oguz A, Palileo-Villanueva LM, Poltyn-Zaradna K, R SP, Pinnaka LVM,  
414 Serón P, Teo K, Verghese ST, Wielgosz A, Yeates K, Yusuf R, Anand SS, Yusuf S; PURE  
415 investigators. Metabolic, behavioural, and psychosocial risk factors and cardiovascular disease in  
416 women compared with men in 21 high-income, middle-income, and low-income countries: an  
417 analysis of the PURE study. *Lancet* 2022; 400:811-821.
- 418 36. Gupta R, Wood DA. Primary prevention of ischemic heart disease: populations, individuals, and  
419 healthcare professionals. *Lancet.* 2019; 394:685-696.
- 420

421 **Table 1: Hypertension prevalence in Indian states in NFHS-5 in women and men >15 years. Criteria**  
 422 **for diagnosis of hypertension were systolic BP  $\geq$ 140 mmHg and/or diastolic BP  $\geq$ 90 mmHg or on**  
 423 **medical treatment.**

|                         | Sample size   |               | Age-standardized hypertension prevalence (%) |             |             |
|-------------------------|---------------|---------------|----------------------------------------------|-------------|-------------|
|                         | Women         | Men           | Women                                        | Men         | Combined    |
| <b>India</b>            | <b>624115</b> | <b>101839</b> | <b>21.3</b>                                  | <b>24.0</b> | <b>22.4</b> |
| Andaman Nicobar Islands | 2397          | 367           | 25.3                                         | 30.2        | 26.0        |
| Andhra Pradesh          | 10975         | 1558          | 25.3                                         | 29          | 25.8        |
| Arunachal Pradesh       | 19765         | 2881          | 24.9                                         | 33.1        | 25.9        |
| Assam                   | 34979         | 4973          | 19.1                                         | 20.3        | 19.2        |
| Bihar                   | 42483         | 4897          | 15.9                                         | 18.4        | 16.2        |
| Chandigarh              | 746           | 104           | 25                                           | 30.6        | 25.7        |
| Chhattisgarh            | 28468         | 4174          | 23.6                                         | 27.7        | 24.1        |
| Delhi                   | 11159         | 1700          | 24.1                                         | 32.8        | 25.3        |
| Goa                     | 2030          | 313           | 27.5                                         | 26.8        | 27.4        |
| Gujarat                 | 33343         | 5351          | 20.6                                         | 20.3        | 20.6        |
| Haryana                 | 21909         | 3224          | 21                                           | 25.1        | 21.5        |
| Himachal Pradesh        | 10368         | 1477          | 22.2                                         | 24.4        | 22.5        |
| Jammu & Kashmir         | 23037         | 3087          | 20                                           | 18.9        | 19.9        |
| Jharkhand               | 26495         | 3414          | 17.8                                         | 22.6        | 18.3        |
| Karnataka               | 30455         | 4516          | 25                                           | 26.9        | 25.2        |
| Kerala                  | 10969         | 1473          | 30.9                                         | 32.8        | 31.1        |
| Lakshadweep             | 1234          | 135           | 24.8                                         | 24.7        | 24.8        |
| Madhya Pradesh          | 48410         | 7025          | 20.6                                         | 22.7        | 20.9        |
| Maharashtra             | 33755         | 5497          | 23.1                                         | 24.4        | 23.3        |
| Manipur                 | 8042          | 1162          | 23                                           | 33.2        | 24.3        |
| Meghalaya               | 13089         | 1824          | 18.7                                         | 21.4        | 19.0        |
| Mizoram                 | 7279          | 1105          | 17.7                                         | 25.2        | 18.7        |
| Nagaland                | 9694          | 1456          | 22.4                                         | 28.7        | 23.2        |
| Odisha                  | 27971         | 3865          | 22.4                                         | 25.6        | 22.8        |
| Puducherry              | 3669          | 534           | 23                                           | 30.1        | 23.9        |
| Punjab                  | 21771         | 3296          | 31.2                                         | 37.7        | 32.1        |
| Rajasthan               | 42990         | 6353          | 15.4                                         | 17.9        | 15.7        |
| Sikkim                  | 3271          | 469           | 34.5                                         | 41.6        | 35.4        |
| Tamil Nadu              | 25650         | 3372          | 24.8                                         | 30.2        | 25.4        |
| Telangana               | 27518         | 3863          | 26.1                                         | 31.4        | 26.8        |
| Tripura                 | 7314          | 990           | 20.9                                         | 22.7        | 21.1        |
| Uttarakhand             | 13280         | 1586          | 22.9                                         | 31.8        | 23.8        |
| Uttar Pradesh           | 93124         | 12043         | 18.4                                         | 21.7        | 18.8        |
| West Bengal             | 21408         | 3021          | 20.5                                         | 20.1        | 20.5        |

424

425

426

**Table 2: Age-specific hypertension prevalence in Indian states in women and men.**

| Age-groups        | Women       |            |             |             |             |             | Men         |            |             |             |             |             |
|-------------------|-------------|------------|-------------|-------------|-------------|-------------|-------------|------------|-------------|-------------|-------------|-------------|
|                   | <30         | 30-39      | 40-49       | 50-59       | 60+         | <30         | 30-39       | 40-49      | 50-59       | 60+         |             |             |
| <b>India</b>      | <b>21.3</b> | <b>8.0</b> | <b>15.3</b> | <b>27.0</b> | <b>39.6</b> | <b>52.8</b> | <b>24.0</b> | <b>8.4</b> | <b>19.3</b> | <b>28.4</b> | <b>36.5</b> | <b>45.5</b> |
| Andaman & Nicobar | 25.3        | 6.3        | 19.5        | 33.2        | 41.8        | 55.9        | 30.2        | 11.1       | 25.8        | 35.4        | 45.5        | 54.4        |
| Andhra Pradesh    | 25.3        | 4.8        | 13.4        | 28.3        | 44.1        | 59.5        | 29.0        | 9.1        | 24.1        | 33.4        | 43.5        | 49.1        |
| Arunachal Pradesh | 24.9        | 12.0       | 24.6        | 32.0        | 44.3        | 51.9        | 33.1        | 14.9       | 31.3        | 40.1        | 49.3        | 52.7        |
| Assam             | 19.1        | 13.4       | 19.2        | 29.8        | 40.9        | 52.0        | 20.3        | 6.9        | 14.9        | 25.2        | 32.3        | 43.6        |
| Bihar             | 15.9        | 5.0        | 10.8        | 20.3        | 29.7        | 40.9        | 18.4        | 6.2        | 13.6        | 20.9        | 28.1        | 35.7        |
| Chandigarh        | 25.0        | 4.7        | 15.4        | 33.2        | 50.9        | 63.4        | 30.6        | 10.2       | 26.5        | 41.2        | 50.2        | 57.8        |
| Chhattisgarh      | 23.6        | 7.5        | 17.6        | 29.6        | 43.2        | 55.1        | 27.7        | 11.2       | 24.6        | 35.8        | 42.6        | 49.8        |
| Delhi             | 24.1        | 6.5        | 16.9        | 32.1        | 46.4        | 64.0        | 32.8        | 14.1       | 29.5        | 41.9        | 54.6        | 63.3        |
| Goa               | 27.5        | 38.2       | 37.6        | 47.6        | 61.6        | 74.3        | 26.8        | 5.2        | 19.3        | 22.3        | 39.4        | 59.7        |
| Gujarat           | 20.6        | 7.2        | 13.4        | 23.6        | 37.0        | 50.7        | 20.3        | 6.9        | 16.1        | 24.7        | 30.6        | 42.1        |
| Haryana           | 21.0        | 6.2        | 14.1        | 24.82       | 38.2        | 48.8        | 25.1        | 9.4        | 22.2        | 31.8        | 41.5        | 46.8        |
| Himachal Pradesh  | 22.2        | 3.9        | 11.0        | 23.0        | 34.3        | 51.1        | 24.4        | 9.1        | 16.4        | 25.9        | 33.3        | 43.8        |
| Jammu & Kashmir   | 20.0        | 23.4       | 20.1        | 29.7        | 44.5        | 57.0        | 18.9        | 5.4        | 11.1        | 20.3        | 33.1        | 44.4        |
| Jharkhand         | 17.8        | 5.2        | 11.4        | 20.0        | 34.5        | 48.7        | 22.6        | 7.6        | 17.3        | 27.2        | 35.3        | 46.1        |
| Karnataka         | 25.0        | 14.3       | 20.6        | 34.6        | 49.2        | 63.0        | 26.9        | 8.1        | 20.9        | 31.9        | 40.4        | 50.5        |
| Kerala            | 30.9        | 5.0        | 11.6        | 26.1        | 44.3        | 68.5        | 32.8        | 6.3        | 17.3        | 31.9        | 43.5        | 61.7        |
| Ladakh            | 15.7        | 23.0       | 18.4        | 19.5        | 31.6        | 42.3        | 17.4        | 6.3        | 12.9        | 21.7        | 26.7        | 35.5        |
| Lakshadweep       | 24.8        | 2.7        | 11.7        | 20.9        | 42.5        | 73.3        | 24.7        | 5.3        | 15.0        | 19.3        | 42.3        | 57.2        |
| Madhya Pradesh    | 20.6        | 5.6        | 13.5        | 24.8        | 38.8        | 50.7        | 22.7        | 8.4        | 19.4        | 27.7        | 34.5        | 42.5        |
| Maharashtra       | 23.1        | 8.0        | 14.7        | 26.4        | 41.3        | 52.9        | 24.4        | 8.5        | 19.8        | 29.0        | 35.7        | 46.2        |
| Manipur           | 23.0        | 8.4        | 17.8        | 29.4        | 40.7        | 47.7        | 33.2        | 12.6       | 29.5        | 40.6        | 48.1        | 54.8        |
| Meghalaya         | 18.7        | 13.4       | 21.7        | 28.7        | 37.9        | 48.7        | 21.4        | 9.8        | 20.2        | 30.7        | 40.4        | 43.6        |
| Mizoram           | 17.7        | 8.3        | 13.3        | 20.6        | 25.6        | 35.2        | 25.2        | 13.3       | 20.6        | 29.8        | 35.0        | 43.4        |
| Nagaland          | 22.4        | 17.6       | 22.7        | 37.5        | 50.0        | 55.3        | 28.7        | 7.8        | 22.4        | 33.3        | 44.1        | 55.0        |
| Odisha            | 22.4        | 6.3        | 15.4        | 28.8        | 37.2        | 50.3        | 25.6        | 9.3        | 20.5        | 28.9        | 35.0        | 44.4        |
| Punjab            | 31.2        | 7.7        | 20.5        | 39.41       | 51.6        | 65.3        | 37.7        | 14.4       | 32.0        | 46.9        | 57.6        | 64.7        |
| Puducherry        | 23.0        | 5.6        | 8.5         | 20.4        | 42.5        | 51.5        | 30.1        | 8.2        | 26.0        | 36.1        | 46.5        | 51.1        |
| Rajasthan         | 15.4        | 4.9        | 10.4        | 18.0        | 30.6        | 42.1        | 17.9        | 6.3        | 14.5        | 20.6        | 29.0        | 37.8        |
| Sikkim            | 34.5        | 16.3       | 30.5        | 47.3        | 56.6        | 68.2        | 41.6        | 20.4       | 38.5        | 48.9        | 57.1        | 67.1        |
| Tamil Nadu        | 24.8        | 4.6        | 12.5        | 25.0        | 40.4        | 55.1        | 30.2        | 10.3       | 24.5        | 34.7        | 43.3        | 48.9        |
| Telangana         | 26.1        | 8.4        | 17.8        | 33.5        | 48.0        | 61.1        | 31.4        | 11.3       | 27.7        | 38.2        | 46.5        | 51.9        |
| Tripura           | 20.9        | 6.8        | 15.1        | 27.0        | 34.4        | 49.5        | 22.7        | 9.4        | 17.3        | 25.7        | 34.2        | 40.9        |
| Uttarakhand       | 22.9        | 6.3        | 16.3        | 29.4        | 38.7        | 52.6        | 31.8        | 13.3       | 28.3        | 41.2        | 45.3        | 52.1        |
| Uttar Pradesh     | 18.4        | 7.0        | 15.3        | 24.2        | 35.0        | 46.7        | 21.7        | 8.8        | 19.7        | 26.4        | 34.1        | 40.9        |
| West Bengal       | 20.5        | 16.8       | 22.9        | 35.3        | 45.2        | 58.1        | 20.1        | 6.5        | 13.1        | 22.2        | 30.9        | 44.6        |

$\chi^2$  trend (p value <0.001 for all states)

427

428

429

430  
431

**Table 3: Hypertension prevalence (% , 95% CI) in women according to tertiles of various social indicators**

| Variable                                              | Hypertension prevalence (%) |                 |                 | F-ratio (p value) |
|-------------------------------------------------------|-----------------------------|-----------------|-----------------|-------------------|
|                                                       | Low tertile                 | Middle tertile  | High tertile    |                   |
| <b>Socioeconomic and environmental determinants</b>   |                             |                 |                 |                   |
| Multidimensional poverty index                        | 22.8(17.7-28.0)             | 18.6(14.6-22.6) | 17.7(14.2-21.1) | 66.72 (0.00)      |
| Illiteracy (women)                                    | 18.4(14.5-22.4)             | 20.4(15.8-25.1) | 23.8(18.3-29.2) | 52.77(0.00)       |
| Health insurance status (any member)                  | 21.2(15.7-26.6)             | 22.0(17.1-26.9) | 20.7(15.6-25.8) | 2.95(0.05)        |
| Electricity access                                    | 18.8(14.5-23.2)             | 18.6(14.0-23.3) | 21.6(16.4-26.8) | 6.83(0.00)        |
| Improved drinking water                               | 18.0(15.1-21.0)             | 20.4(15.9-26.8) | 24.8(21.0-26.8) | 2.70(0.06)        |
| Improved sanitation                                   | 167.4(14.0-20.9)            | 20.1(16.0-24.1) | 23.8(18.1-29.4) | 76.36(0.00)       |
| Clean fuel for cooking                                | 19.2(15.1-23.3)             | 20.7(15.5-25.9) | 24.5(19.6-29.4) | 78.03(0.00)       |
| Tobacco use (women)                                   | 21.5(16.2-26.8)             | 21.2(17.4-25.0) | 19.0(13.8-24.1) | 2.77(0.06)        |
| <b>Healthcare services and women-specific factors</b> |                             |                 |                 |                   |
| Skilled childbirth services                           | 21.0(15.7-26.3)             | 18.4(14.5-22.3) | 21.6(16.4-26.9) | 9.3(0.00)         |
| Modern contraception use                              | 19.2(15.5-23.0)             | 20.7(15.3-26.0) | 22.5(17.5-27.6) | 15.55(0.00)       |
| Full vaccination                                      | 20.3(15.6-25.0)             | 20.5(25.4-25.6) | 22.3(17.2-27.4) | 11.00(0.00)       |
| Child marriage                                        | 22.7(17.2-28.2)             | 20.6(16.0-25.1) | 17.8(14.2-21.3) | 35.16(0.00)       |
| Teenage pregnancy                                     | 21.7(16.3-27.1)             | 20.4(16.0-24.8) | 19.0(15.3-22.8) | 6.09(0.00)        |
| Anemia (adult women)                                  | 24.5(18.1-31.1)             | 21.4(16.4-26.4) | 19.0(15.1-22.8) | 27.32(0.00)       |
| <b>Nutritional and other factors</b>                  |                             |                 |                 |                   |
| Childhood stunting                                    | 23.8(18.3-29.3)             | 20.6(15.8-25.3) | 18.3(14.6-22.0) | 46.83(0.00)       |
| Childhood wasting                                     | 22.2(16.8-27.7)             | 20.3(15.6-24.9) | 20.5(15.8-25.2) | 12.92(0.00)       |
| Underweight children <5 years                         | 23.6(18.1-29.1)             | 20.3(15.8-24.8) | 18.8(14.1-23.4) | 43.71(0.00)       |
| Overweight children <5 years                          | 21.4(16.2-26.5)             | 21.0(16.2-25.9) | 26.1(17.3-34.8) | 4.28(0.014)       |
| Overweight adult (women)                              | 18.9(14.8-23.0)             | 22.2(17.6-26.9) | 27.0(22.2-31.9) | 137.38(0.00)      |
| Hyperglycemia (random glucose $\geq$ 140 mg/dl)       | 20.1(15.4-24.7)             | 23.3(18.1-28.4) | 29.7(25.2-34.1) | 63.93(0.00)       |
| CI confidence intervals,                              |                             |                 |                 |                   |

432  
433

434

435

436

**Table 4: Univariate and multivariate regression analysis (standardized b) of district-level hypertension prevalence (women) with various socioeconomic and other factors.**

437

| Variable                                                          | Univariate standardized beta coefficient (p-value) | Multivariate adjusted standardized beta coefficient (for all variables) (p value) |
|-------------------------------------------------------------------|----------------------------------------------------|-----------------------------------------------------------------------------------|
| <b>Socioeconomic and environmental determinants</b>               |                                                    |                                                                                   |
| Multidimensional poverty index                                    | -0.21(0.00)                                        | -0.04(0.73)                                                                       |
| Illiteracy (Women)                                                | -0.17(0.00)                                        | -0.12(0.00)                                                                       |
| Health insurance (any member)                                     | 0.00(0.99)                                         | 0.01(0.90)                                                                        |
| Electricity access                                                | 0.34(0.00)                                         | -0.04(0.44)                                                                       |
| Improved drinking water                                           | 0.06 (0.01)                                        | 0.11(0.01)                                                                        |
| Improved sanitation                                               | 0.17(0.00)                                         | 0.19(0.00)                                                                        |
| Clean fuel for cooking                                            | 0.10(0.00)                                         | -0.04(0.52)                                                                       |
| Tobacco use (women)                                               | 0.05(0.00)                                         | 0.07(0.15)                                                                        |
| <b>Healthcare service delivery and female specific parameters</b> |                                                    |                                                                                   |
| Skilled delivery                                                  | 0.15(0.00)                                         | -0.09(0.10)                                                                       |
| Modern contraception use                                          | 0.09(0.00)                                         | 0.20(0.00)                                                                        |
| Full vaccination                                                  | 0.08(0.00)                                         | 0.04(0.38)                                                                        |
| Child marriage                                                    | -0.14(0.00)                                        | -0.12(0.09)                                                                       |
| Teenage pregnancy                                                 | -0.15(0.00)                                        | 0.06(0.33)                                                                        |
| Anemia (women)                                                    | -0.12(0.00)                                        | -0.11(0.07)                                                                       |
| <b>Nutritional factors (female)</b>                               |                                                    |                                                                                   |
| Childhood stunting                                                | -0.26(0.00)                                        | -0.13(0.07)                                                                       |
| Childhood wasting                                                 | -0.18(0.00)                                        | -0.09(0.22)                                                                       |
| Underweight children <5 years                                     | -0.20(0.00)                                        | 0.21(0.06)                                                                        |
| Overweight children <5 years                                      | 0.18(0.00)                                         | 0.04(0.40)                                                                        |
| Overweight adult women                                            | 0.28(0.00)                                         | 0.44(0.00)                                                                        |
| Hyperglycemia women                                               | 0.47(0.00)                                         | 0.10(0.06)                                                                        |

438

439

440
